# Supplementary material
Source: HighWire-hosted journal article supplement (https://www.cmaj.ca/highwire/filestream/58967/field_highwire_adjunct_files/0/interven-ioann-1-at.pdf)
Supplement: interven-ioann-1-at.pdf [file interven-ioann-1-at.pdf]

**Appendix 1 (as supplied by the authors): Search strategy**

| <b>Search</b> |                                                                      |
|---------------|----------------------------------------------------------------------|
| <b>#1</b>     | *hospitali*:ti,ab,kw                                                 |
| <b>#2</b>     | (*admission*:ti,ab,kw) OR (*admit*:ti,ab,kw)                         |
| <b>#3</b>     | (hospital* NEAR stay*):ti,ab,kw                                      |
| <b>#4</b>     | (#1 OR #2 OR #3)                                                     |
| <b>#5</b>     | "analysis" NEAR/30 (*hospitali* OR *admission* OR admit*)            |
| <b>#6</b>     | "analysis" NEAR/30 "hospital stay"                                   |
| <b>#7</b>     | "analysis" NEAR/30 (death* or mortality or fatal or died or surviv*) |
| <b>#8</b>     | (( #5 OR #6 ) AND #7)                                                |
| <b>#9</b>     | (#4 OR #8)                                                           |
